# Supplementary material for: The Epstein–Barr virus lytic cycle activator Zta interacts with methylated ZRE in the promoter of host target gene egr1
Source: PubMed Central journal article supplement (PMC2885059; doi:10.1099/vir.0.007922-0), 2009-06
Supplement: supp_90_6_1450__1.pdf [file supp_90_6_1450__1.pdf]

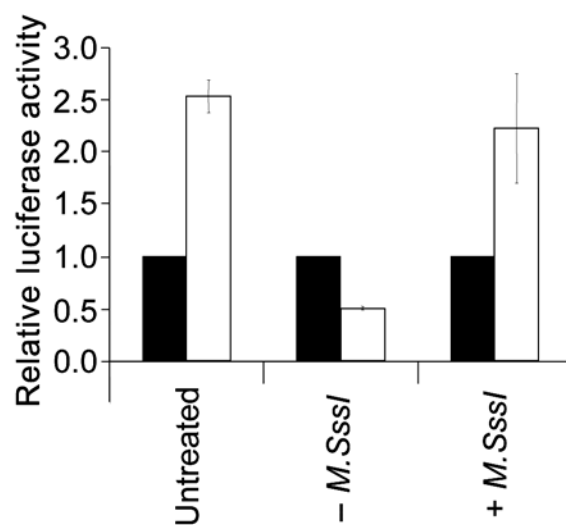

**Supplementary Fig. S1.** Effect of methylation and Zta expression on the activity of the *egr1* promoter in U2OS cells. U2OS cell lines were transfected with the indicated plasmids using Effectene (Qiagen). After 48 h cell extracts were prepared and assayed for luciferase activity using the luciferase assay system (Promega). The data for each type of plasmid [luciferase activity ( $\mu\text{g protein}^{-1}$ )] are expressed relative to the activity levels seen in the absence of Zta, together with the SD, which was derived from at least two experiments. The reporter plasmid used was *egr1* (-504/+9)LUC (Chang *et al.*, 2006). The plasmid was transfected in an untreated form; or it underwent a mock methylation reaction (-*M.SssI*); or it went through an overnight methylation reaction with the methyl transferase *M.SssI* (New England Biolabs) (+*M.SssI*) followed by purification on a QIAprep column (Qiagen). Prior to transfection, the extent of methylation was evaluated by a diagnostic digestion with the methylation-sensitive restriction enzyme *Bst*UI. The open bars represent transfections undertaken with pBabe BZLF1 (Hicks *et al.*, 2003), while the filled bars represent transfections undertaken with the ‘empty’ pBabe vector.
